# Supplementary material for: Small Molecule Inhibition of Ligand-Stimulated RAGE-DIAPH1 Signal Transduction
Source: PubMed Central journal article supplement (PMC4776135; doi:10.1038/srep22450), 2016-03-03
Supplement: srep22450-s1.pdf [file srep22450-s1.pdf]

**Supplementary Information for:**

**Small Molecule Inhibition of Ligand-Stimulated**

**RAGE-DIAPH1 Signal Transduction**

Michael B. Manigrasso<sup>1@</sup>, Jinhong Pan<sup>2@</sup>, Vivek Rai<sup>1.@</sup>, Jinghua Zhang<sup>1</sup>, Sergey Reverdatto<sup>2</sup>,  
Nosirudeen Quadri<sup>1</sup>, Robert J. DeVita<sup>3</sup>, Ravichandran Ramasamy<sup>1</sup>, Alexander Shekhtman<sup>2.^.\*</sup> &  
Ann Marie Schmidt<sup>1.^.\*</sup>

@ These authors contributed equally to this work.

^Co-Senior Authors

<sup>1</sup>Diabetes Research Program, Department of Medicine, New York University Langone Medical Center, 550 First Avenue, New York, New York 10016

<sup>2</sup>Department of Chemistry, University at Albany, State University of New York,  
1400 Washington Avenue, Albany, New York 12222

<sup>3</sup>RJD Medicinal Chemistry and Drug Discovery Consulting LLC, 332 W. Dudley Avenue,  
Westfield, New Jersey 07090

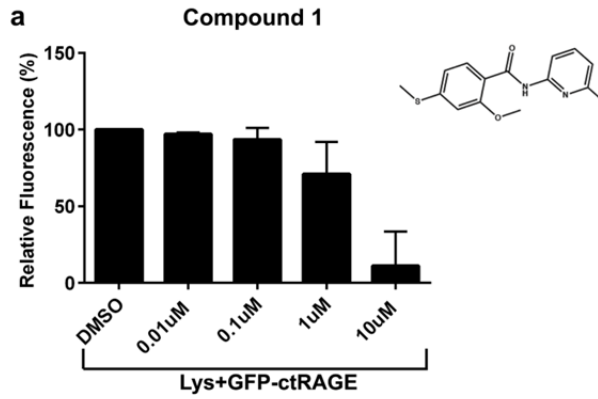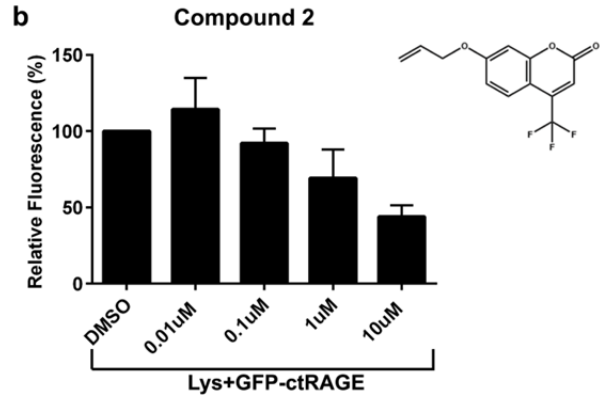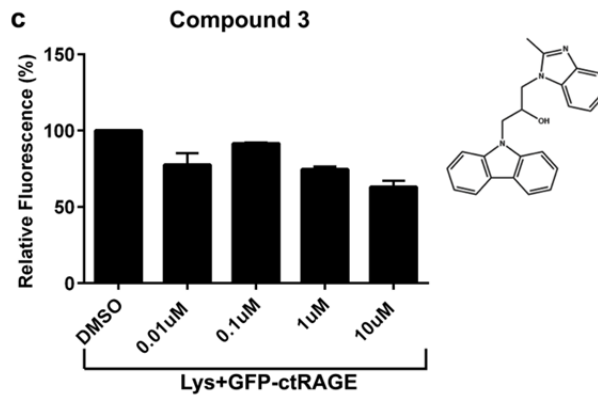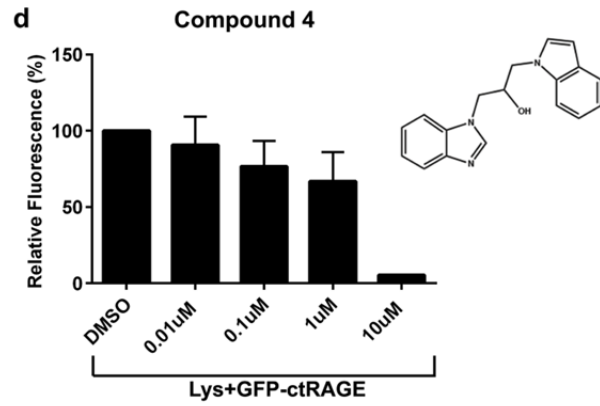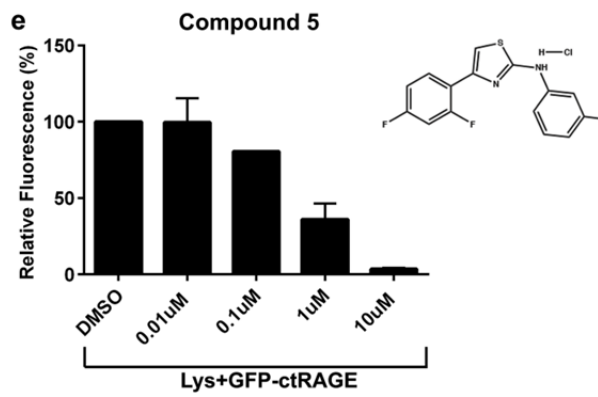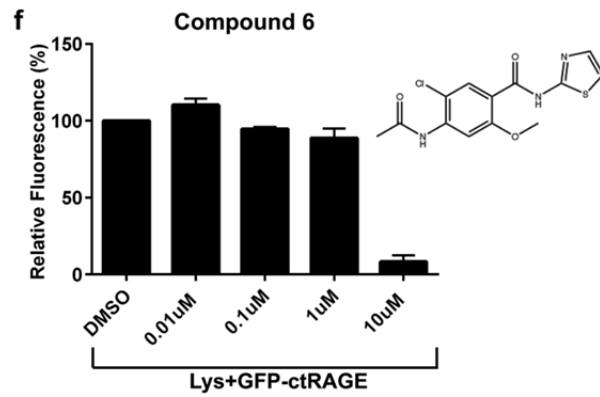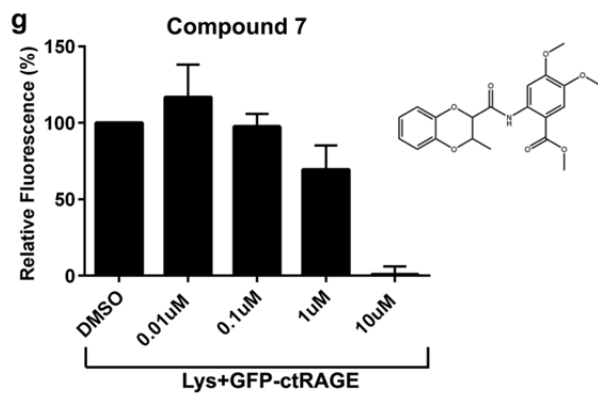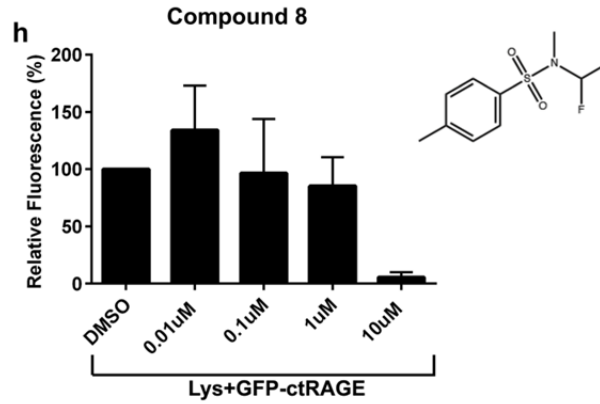

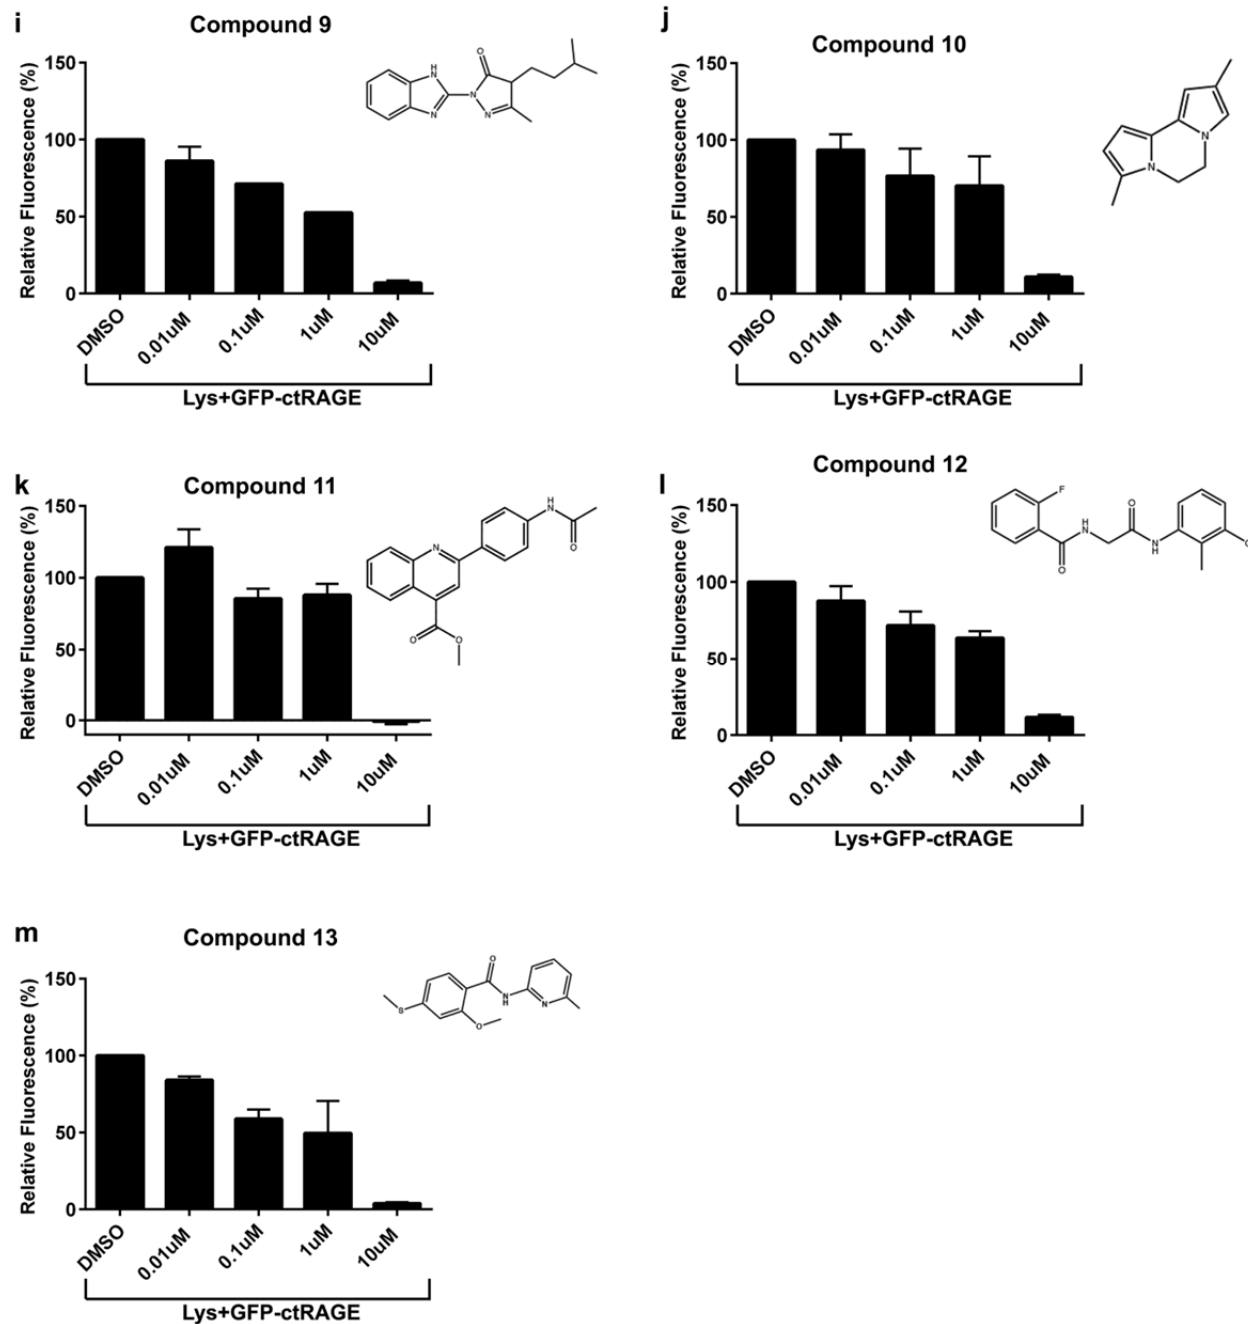

**Supplementary Figure S1. Small molecule competitive inhibition of binding of ctRAGE to DIAPH1.** (a-m). Testing of compounds 1-13 in the high throughput screening assays reveals a dose-dependent binding of fluorescent GFP-labeled ctRAGE to DIAPH1. Compounds were tested in duplicate at 10  $\mu$ M, 1  $\mu$ M, 0.1  $\mu$ M, and 0.01  $\mu$ M. Structures of compounds 1-13 are illustrated in the figure.

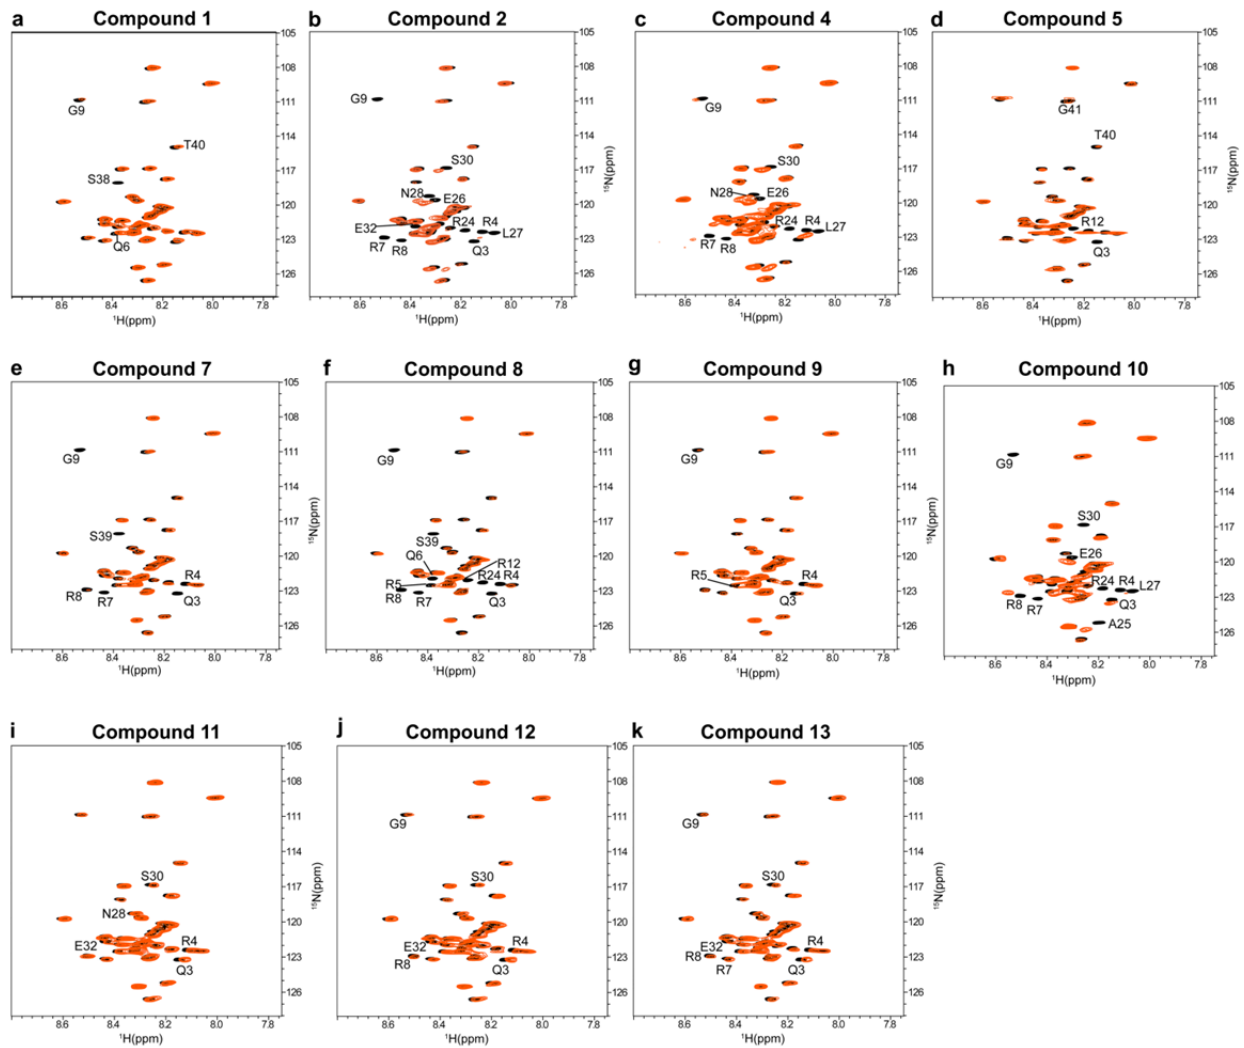

**Supplementary Figure S2. Compounds 1, 2, 4, 5, 7, 8, 9, 10, 11, 12, and 13 bind to the structured part of ctRAGE.**  $^1\text{H}\{^{15}\text{N}\}$  HSQC NMR spectra of  $[U\text{-}^{15}\text{N}]$  RAGE tail bound to compound 1(a), 2(b), 4(c), 5(d), 7(e), 8(f), 9(g), 10(h), 11(i), 12(j), and 13(k). The NMR peaks of ctRAGE residues that underwent either changes in the chemical shifts or extensive broadening due to interaction with the library compounds are labeled.

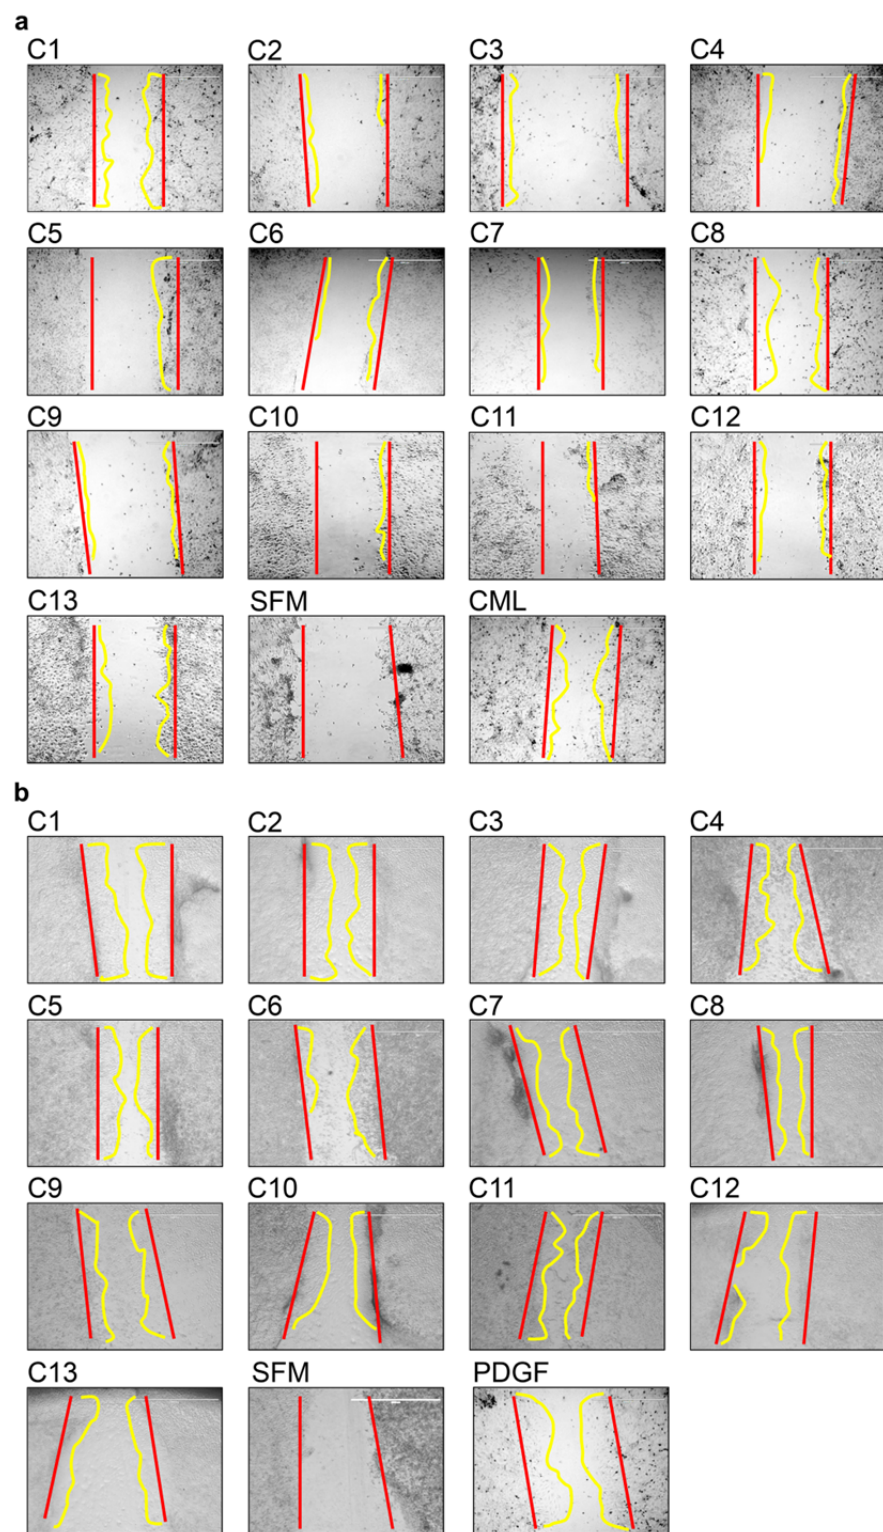

**Supplementary Figure S3. Effects of compounds 1-13 on RAGE ligand- or PDGF-stimulated migration of murine SMCs.** Migration of SMCs after incubation with compounds

1-13 was assessed. After the addition of the compounds 1-13 (1  $\mu$ M) to the individual wells, a wound was immediately created down the center of the well using a p200 tip and a baseline photograph was taken. After 1.5 h incubation, the compounds were removed and murine aortic SMCs were stimulated with CML-AGE (10  $\mu$ g/ml) (a) or PDGF-BB (10 ng/ml) (b) for 7 h, and final images were taken. Each compound was tested in three independent wells and each well was photographed in 3 separate locations for a total of 9 images used. Representative images are shown.

**Supplementary Table S1.** Small molecule screening protocol and results

| <b>Category</b>                          | <b>Parameter</b>                    | <b>Description</b>                                                                                                                                                                                                                                                                                 |
|------------------------------------------|-------------------------------------|----------------------------------------------------------------------------------------------------------------------------------------------------------------------------------------------------------------------------------------------------------------------------------------------------|
| Assay                                    | Type of assay                       | <i>In vitro</i> Binding Assay                                                                                                                                                                                                                                                                      |
|                                          | Target                              | GFP-ctRAGE – DIAPH1 binding                                                                                                                                                                                                                                                                        |
|                                          | Primary measurement                 | GFP Fluorescence                                                                                                                                                                                                                                                                                   |
|                                          | Key reagents                        | GFP-ctRAGE and DIAPH1 (HeLa cell lysate)                                                                                                                                                                                                                                                           |
|                                          | Assay protocol                      | High Throughput Binding Assay (See Methods)                                                                                                                                                                                                                                                        |
|                                          | Additional comments                 | N/A                                                                                                                                                                                                                                                                                                |
| Library                                  | Library size                        | 58,000 compounds                                                                                                                                                                                                                                                                                   |
|                                          | Library composition                 | Small molecule commercially-available library                                                                                                                                                                                                                                                      |
|                                          | Source                              | DIVERSet library (CHEMBRIDGE), CT488A                                                                                                                                                                                                                                                              |
|                                          | Additional comments                 | N/A                                                                                                                                                                                                                                                                                                |
| Screen                                   | Format                              | 384 well format                                                                                                                                                                                                                                                                                    |
|                                          | Concentration(s) tested             | 10 $\mu$ M, final concentration dissolved in 0.1% DMSO                                                                                                                                                                                                                                             |
|                                          | Plate controls                      | Hela Lysate (DIAPH1) and GFP-ctRAGE                                                                                                                                                                                                                                                                |
|                                          | Reagent/ compound dispensing system | Microplate Reader (PerkinElmer, Inc)                                                                                                                                                                                                                                                               |
|                                          | Detection instrument and software   | Envision Software                                                                                                                                                                                                                                                                                  |
|                                          | Assay validation/QC                 | Z' score, 0.62; S/N, 8.3                                                                                                                                                                                                                                                                           |
|                                          | Correction factors                  | None                                                                                                                                                                                                                                                                                               |
|                                          | Normalization                       | Plate background with no GFP                                                                                                                                                                                                                                                                       |
|                                          | Additional comments                 | N/A                                                                                                                                                                                                                                                                                                |
|                                          | Post-HTS analysis                   | Hit criteria                                                                                                                                                                                                                                                                                       |
| Hit rate                                 |                                     | 1.5 %                                                                                                                                                                                                                                                                                              |
| Additional assay(s)                      |                                     | Secondary Assay – Positive hits above (N=777) subjected to 4 point dose response [10, 1, 0.1 and 0.01 $\mu$ M] $\rightarrow$ (N=97) Compounds Subjected to Nuclear Magnetic Resonance (NMR) for Binding to ctRAGE and not DIAPH1 $\rightarrow$ (N=13) Subjected to Fluorescence Titration for IC50 |
| Confirmation of hit purity and structure |                                     | Liquid chromatography-Mass Spectrometry and NMR                                                                                                                                                                                                                                                    |
|                                          | Additional comments                 | N/A                                                                                                                                                                                                                                                                                                |

**Supplementary Table S2. Compounds 1-13 Bind to the Cytoplasmic Domain of RAGE:  
Dissociation Constants**

| <b>Compound</b> | <b>Dissociation Constant (nM)</b> |
|-----------------|-----------------------------------|
| 1               | 9±4                               |
| 2               | 3±1                               |
| 3               | 18±4                              |
| 4               | 2±1                               |
| 5               | 1±0.5                             |
| 6               | 0.3±0.05                          |
| 7               | 3±1                               |
| 8               | 1.5±0.5                           |
| 9               | 3±1                               |
| 10              | 2±0.5                             |
| 11              | 2±0.6                             |
| 12              | 32±10                             |
| 13              | 6±3                               |



**Supplementary Table S3.** Characteristics of Mice Studied in the Isolated Perfused Heart

|                        | <b>DMSO</b> | <b>C1</b> | <b>C2</b> | <b>C3</b>  | <b>C4</b>  | <b>C5</b>  | <b>C6</b>  |
|------------------------|-------------|-----------|-----------|------------|------------|------------|------------|
| <b>n</b>               | 6           | 6         | 6         | 6          | 6          | 5          | 6          |
| <b>Body Weight (g)</b> | 25.2±2.7    | 24.4±3.1  | 22.4±4.4  | 25.1±2.8   | 24.8±3.7   | 25.6±3.6   | 21.9±1.9   |
| <b>Glucose (mg/dL)</b> | 333±76      | 367±83    | 357±58    | 362±65     | 379±74     | 285±40     | 347±63     |
| <b>Days diabetic</b>   | 40±10       | 44±5      | 44±5      | 39±7       | 42±7       | 41±8       | 38±11      |
|                        | <b>C7</b>   | <b>C8</b> | <b>C9</b> | <b>C10</b> | <b>C11</b> | <b>C12</b> | <b>C13</b> |
| <b>n</b>               | 6           | 6         | 6         | 6          | 6          | 6          | 6          |
| <b>Body Weight (g)</b> | 21.6±1.4    | 23.67±1.9 | 25.1±5.0  | 24.2±2.9   | 25.1±2.4   | 24.8±2.3   | 24.0±3.0   |
| <b>Glucose (mg/dL)</b> | 333±77      | 329±73    | 328±43    | 380±68     | 348±46     | 353±86     | 327±43     |
| <b>Days diabetic</b>   | 45±7        | 38±7      | 40±6      | 37±8       | 40±6       | 42±7       | 38±9       |

**Supplementary Table S4.** Materials for performance of the real time PCR experiments

| Gene Name<br>(Taqman) | Gene Symbol | Assay ID/catalog number |
|-----------------------|-------------|-------------------------|
| TNF                   | <i>Tnf</i>  | Mm00443258_m1           |
| IL6                   | <i>Il6</i>  | Mm00446190_m1           |
| ACTB                  | <i>Actb</i> | 4352341E                |
| TNF                   | <i>TNF</i>  | Hs01113624_g1           |
| IL6                   | <i>IL6</i>  | Hs00985639_m1           |
| Eukaryotic 18S        | <i>18S</i>  | 4310893E                |
